# Supplementary material for: Occurrence and Antigenic Specificity of Perinuclear Anti-Neutrophil Cytoplasmic Antibodies (P-ANCA) in Systemic Autoimmune Diseases
Source: MDPI journal article supplement (doi:10.3390/cells10082128), 2021-08-19
Supplement: s1 [file s1]

**Supplementary Table S1. Clinical and Laboratory features of patients with systemic vasculitis, SLE and APS.**

|                                                            | <b>Vasculitis patients (n=24)</b> |                     |                           |                      |                     | <b>LE/APS patients (n=33)</b> |                      |
|------------------------------------------------------------|-----------------------------------|---------------------|---------------------------|----------------------|---------------------|-------------------------------|----------------------|
|                                                            | <b>MPA<br/>(n=18)</b>             | <b>BD<br/>(n=2)</b> | <b>Aortitis<br/>(n=1)</b> | <b>HSP<br/>(n=2)</b> | <b>CV<br/>(n=1)</b> | <b>SLE<br/>(n=28)</b>         | <b>APS<br/>(n=5)</b> |
| <b>Age (Median years, range)</b>                           | 65 (27-85)                        | 47(42-52)           | 73                        | 47(17-59)            | 77                  | 47.5 (20-72)                  | 43(31-73)            |
| <b>Gender (men/women)</b>                                  | 3/15                              | 1/1                 | 0/1                       | 2/0                  | 0/1                 | 4/24                          | 1/4                  |
| <b>Clinical &amp; laboratory features (No of Patients)</b> |                                   |                     |                           |                      |                     |                               |                      |
| <b>Non-specific</b>                                        |                                   |                     |                           |                      |                     |                               |                      |
| Chronic fatigue                                            | 14                                | 1                   | 1                         | 0                    | 1                   | 11                            | 0                    |
| Fever                                                      | 12                                | 1                   | 1                         | 2                    | 1                   | 4                             | 1                    |
| SICCA                                                      | 2                                 | 0                   | 1                         | 2                    | 1                   | 6                             | 1                    |
| <b>Glandular</b>                                           |                                   |                     |                           |                      |                     |                               |                      |
| SGE                                                        | 0                                 | 0                   | 0                         | 0                    | 0                   | 2                             | 0                    |
| Lymphadenopathy                                            | 4                                 | 0                   | 0                         | 0                    | 0                   | 3                             | 0                    |
| <b>Eye involvement</b>                                     | 1                                 | 0                   | 0                         | 0                    | 0                   | 0                             | 0                    |
| <b>Serositis</b>                                           | 2                                 | 0                   | 0                         | 0                    | 0                   | 4                             | 0                    |
| <b>Musculoskeletal involvement</b>                         | 8                                 | 1                   | 1                         | 2                    | 1                   | 18                            | 2                    |
| <b>ILD</b>                                                 | 6                                 | 0                   | 0                         | 0                    | 0                   | 0                             | 0                    |
| <b>Infiltrates/Hemoptisis</b>                              | 8                                 | 0                   | 0                         | 0                    | 0                   | 0                             | 0                    |
| <b>Glomerulonephritis</b>                                  | 10                                | 0                   | 0                         | 0                    | 0                   | 9                             | 0                    |
| <b>IgA nephropathy</b>                                     | 0                                 | 0                   | 0                         | 1                    | 0                   | 0                             | 0                    |
| <b>PNS</b>                                                 | 2                                 | 0                   | 0                         | 0                    | 1                   | 0                             | 0                    |
| <b>CNS</b>                                                 | 0                                 | 0                   | 0                         | 0                    | 0                   | 2                             | 0                    |
| <b>Skin involvement</b>                                    |                                   |                     |                           |                      |                     |                               |                      |
| Purpura                                                    | 1                                 | 1                   | 0                         | 2                    | 1                   | 2                             | 0                    |
| Mucosal ulcers                                             | 0                                 | 2                   | 0                         | 1                    | 0                   | 0                             | 1                    |
| Other                                                      | 2                                 | 1                   | 0                         | 0                    | 0                   | 22                            | 2                    |
| <b>Vascular</b>                                            |                                   |                     |                           |                      |                     |                               |                      |
| Raynaud's phenomenon                                       | 0                                 | 0                   | 0                         | 0                    | 1                   | 3                             | 1                    |
| Vasculitic ulcers                                          | 0                                 | 0                   | 0                         | 0                    | 0                   | 0                             | 0                    |
| DVT                                                        | 2                                 | 0                   | 0                         | 0                    | 0                   | 2                             | 0                    |
| PE                                                         | 1                                 | 0                   | 0                         | 0                    | 0                   | 0                             | 3                    |
| Aneurysms                                                  | 0                                 | 0                   | 1                         | 0                    | 0                   | 0                             | 0                    |
| Stroke                                                     | 0                                 | 0                   | 0                         | 0                    | 0                   | 0                             | 1                    |
| <b>Cardiac</b>                                             | 0                                 | 0                   | 0                         | 0                    | 0                   | 1                             | 0                    |
| <b>Gastrointestinal inv</b>                                | 0                                 | 0                   | 0                         | 1                    | 0                   | 1                             | 0                    |
| <b>Laboratory features</b>                                 |                                   |                     |                           |                      |                     |                               |                      |
| Anemia of chronic disease                                  | 16                                | 1                   | 1                         | 1                    | 0                   | 13                            | 1                    |
| AHA                                                        | 0                                 | 0                   | 0                         | 0                    | 0                   | 1                             | 1                    |
| Leukopenia                                                 | 0                                 | 0                   | 0                         | 0                    | 0                   | 6                             | 1                    |
| Thrombocytopenia                                           | 0                                 | 0                   | 0                         | 0                    | 0                   | 2                             | 3                    |

MPA: microscopic polyangiitis, BD: Behcet's disease, HSP: purpura Henoch Schonlein, CV: cryoglobulinemic vasculitis, SLE: systemic lupus erythematosus, APS: antiphospholipid syndrome, SGE: salivary gland enlargement, ILD: interstitial lung disease, PNS: peripheral nervous system, CNS: central nervous system, DVT: deep venous thrombosis, PE: pulmonary emboli, inv: involvement, AHA: autoimmune hemolytic anemia.

**Supplementary Table S2. Clinical and Laboratory features of patients with other autoimmune diseases.**

|                                                        | SS<br>(n=7) | RA<br>(n=3) | SSCL<br>(n=1) | Thyroiditis<br>Hashimoto<br>(n=13) | Sarcoidosis<br>(n=1) |
|--------------------------------------------------------|-------------|-------------|---------------|------------------------------------|----------------------|
| <b>Age [Median (years), range]</b>                     | 74(40-80)   | 50(39-64)   | 64            | 55(34-77)                          | 45                   |
| <b>Gender (man/woman)</b>                              | 1/6         | 0/3         | 0/1           | 2/11                               | 0/1                  |
| <b>Clinical &amp; laboratory features (Patient No)</b> |             |             |               |                                    |                      |
| <b>Non-specific</b>                                    |             |             |               |                                    |                      |
| Chronic fatigue                                        | 3           | 1           | 1             | 2                                  | 1                    |
| Fever                                                  | 2           | 0           | 0             | 0                                  | 0                    |
| Sicca                                                  | 7           | 2           | 0             | 0                                  | 0                    |
| <b>Glandular</b>                                       |             |             |               |                                    |                      |
| SGE                                                    | 1           | 0           | 0             | 0                                  | 1                    |
| Lymphadenopathy                                        | 1           | 1           | 0             | 0                                  | 1                    |
| <b>Eye involvement</b>                                 | 0           | 1           | 0             | 0                                  | 0                    |
| <b>Serositis</b>                                       | 1           | 1           | 0             | 0                                  | 0                    |
| <b>Musculoskeletal involvement</b>                     | 6           | 3           | 1             | 7                                  | 0                    |
| <b>ILD</b>                                             | 1           | 0           | 0             | 0                                  | 0                    |
| <b>Infiltrates/Hemoptysis</b>                          | 0           | 0           | 0             | 0                                  | 0                    |
| <b>Glomerulonephritis</b>                              | 0           | 0           | 0             | 0                                  | 0                    |
| <b>IgA nephropathy</b>                                 | 0           | 0           | 0             | 0                                  | 0                    |
| <b>PNS</b>                                             | 0           | 0           | 0             | 0                                  | 0                    |
| <b>CNS</b>                                             | 0           | 0           | 0             | 0                                  | 0                    |
| <b>Skin involvement</b>                                |             |             |               |                                    |                      |
| Purpura                                                | 2           | 0           | 0             | 0                                  | 0                    |
| Mucosal ulcers                                         | 0           | 0           | 0             | 1                                  | 0                    |
| Other                                                  | 1           | 0           | 1             | 2                                  | 0                    |
| <b>Vascular</b>                                        |             |             |               |                                    |                      |
| Raynaud's phenomenon                                   | 3           | 0           | 0             | 1                                  | 0                    |
| Vasculitic ulcers                                      | 0           | 0           | 0             | 0                                  | 0                    |
| DVT                                                    | 0           | 0           | 0             | 0                                  | 0                    |
| PE                                                     | 0           | 0           | 0             | 0                                  | 0                    |
| Aneurysms                                              | 0           | 0           | 0             | 0                                  | 0                    |
| Stroke                                                 | 0           | 0           | 0             | 0                                  | 0                    |
| <b>Cardiac</b>                                         | 0           | 0           | 0             | 0                                  | 0                    |
| <b>Gastrointestinal inv</b>                            | 0           | 0           | 0             | 1                                  | 0                    |
|                                                        | 0           | 0           | 0             | 0                                  | 0                    |
| <b>Laboratory features</b>                             |             |             |               |                                    |                      |
| Anemia of chronic disease                              | 3           | 0           | 0             | 1                                  | 0                    |
| AHA                                                    | 0           | 0           | 0             | 0                                  | 0                    |
| Leukopenia                                             | 1           | 0           | 0             | 5                                  | 0                    |
| Thrombocytopenia                                       | 0           | 0           | 0             | 0                                  | 0                    |

SS: Sjogren's syndrome, RA: rheumatoid arthritis, SSCL: systemic sclerosis, SGE: salivary gland enlargement, ILD: interstitial lung disease, PNS: peripheral nervous system, CNS: central nervous system, DVT: deep venous thrombosis, PE: pulmonary emboli, inv: involvement, AHA: autoimmune hemolytic anemia.

**Supplementary Table S3. Autoantibody profile of other than MPA and SLE pANCA positive patients sub-grouped per disease type.**

| Antibodies<br>% (n) | Vasculitides<br>(n=24) |                   |              |             | APS<br>(n=5) | SS<br>(n=7) | RA<br>(n=3) | SSCL<br>(n=1) | Thyroiditis<br>Hashimoto<br>(n=13) | Sarcoidosis<br>(n=1) |
|---------------------|------------------------|-------------------|--------------|-------------|--------------|-------------|-------------|---------------|------------------------------------|----------------------|
|                     | BD<br>(n=2)            | Aortitis<br>(n=1) | HSP<br>(n=2) | CV<br>(n=1) |              |             |             |               |                                    |                      |
| ANA                 | 1                      | 1                 | 1            | 1           | 1            | 5           | 2           | 1             | 4                                  | 1                    |
| dsDNA               | 1                      | 0                 | 0            | 0           | 0            | 0           | 0           | 0             | 0                                  | 0                    |
| Ro52                | 0                      | 1                 | 0            | 1           | 0            | 3           | 0           | 0             | 1                                  | 0                    |
| Ro60                | 0                      | 1                 | 0            | 1           | 0            | 3           | 0           | 0             | 1                                  | 0                    |
| Ro52/Ro60           | 0                      | 1                 | 0            | 1           | 0            | 3           | 0           | 0             | 1                                  | 0                    |
| La                  | 0                      | 0                 | 0            | 0           | 0            | 2           | 0           | 0             | 0                                  | 0                    |
| SM                  | 0                      | 0                 | 0            | 0           | 0            | 1           | 0           | 0             | 0                                  | 0                    |
| UIRNP               | 0                      | 0                 | 0            | 0           | 1            | 1           | 0           | 0             | 0                                  | 0                    |
| scl70               | 0                      | 0                 | 0            | 0           | 0            | 0           | 0           | 0             | 0                                  | 0                    |
| RibP                | NM                     | NM                | NM           | NM          | NM           | NM          | NM          | NM            | NM                                 | NM                   |
| aCL-IgM             | 1                      | 0                 | 0            | 0           | 2            | 2           | 0           | 0             | 0                                  | 0                    |
| aCL-IgG             | 0                      | 0                 | 0            | 0           | 1            | 0           | 0           | 0             | 0                                  | 0                    |
| β2GPI-IgM           | 1                      | 0                 | 0            | 0           | 2            | 1           | 1           | 0             | 0                                  | 0                    |
| β2GPI-IgG           | 0                      | 0                 | 0            | 0           | 1            | 0           | 1           | 0             | 0                                  | 0                    |
| RF                  | 0                      | 0                 | 1            | 1           | 0            | 2           | 2           | 0             | 0                                  | 0                    |
| Cryos               | 0                      | 0                 | 0            | 1           | NM           | 0           | 0           | NM            | 0                                  | 0                    |
| CCP                 | 0                      | 0                 | 0            | 0           | 0            | 1           | 3           | NM            | 0                                  | 0                    |
| TPO                 | 0                      | 0                 | 0            | NM          | 1            | 3           | 0           | NM            | 9                                  | 0                    |
| TG                  | 0                      | 0                 | 0            | NM          | 1            | 0           | 0           | NM            | 11                                 | 0                    |

pANCA: perinuclear antineutrophil cytoplasmic antibodies, MPA: microscopic polyangiitis, BD: Behcet's disease, HSP: Henoch-Schonlein purpura, CV: cryoglobulinemic vasculitis, SLE: systemic lupus erythematosus, APS: antiphospholipid syndrome, SS: Sjögren's syndrome, RA: rheumatoid arthritis, SSCL: systemic sclerosis, ANA: antinuclear antibodies, RF: rheumatoid factor, aCL: anti-cardiolipin, cryos: cryoglobulins.
